# Supplementary material for: Phylogeography of Toona ciliata (Meliaceae) Complex in China Inferred from Cytonuclear Markers
Source: MDPI journal article supplement (doi:10.3390/genes14010116), 2022-12-31
Supplement: s1 [file s1]

# Phylogeography of *Toona ciliata* (Meliaceae) complex in China inferred from cytonuclear markers

Yu Xiao<sup>1,2</sup>, Xin-Xin Zhang<sup>1,2</sup>, Ying Hu<sup>1,2</sup>, Xi Wang<sup>1,2</sup>, Pei Li<sup>1,2</sup>, Zi-Han He<sup>1,2</sup>, Yan-Wen Lv<sup>1,2</sup>,  
Xiao-Yang Chen<sup>1,2</sup> and Xin-Sheng Hu<sup>1,2\*</sup>

1 College of Forestry and Landscape Architecture, South China Agricultural University, Guangzhou  
510642, China

2 Guangdong Key Laboratory for Innovative Development and Utilization of Forest Plant  
Germplasm, Guangzhou 510642, China

\* Correspondence: Xin-Sheng Hu; Email: [xinsheng@scau.edu.cn](mailto:xinsheng@scau.edu.cn)

**Running title:** Phylogeography of *Toona ciliata*

**Table S1.** Twenty pairs of primers from mitochondrial DNA tested in *Toona ciliata* complex

| Primer pair             | Forward and reverse primer sequences            | Annealing temperature | Reference                            |
|-------------------------|-------------------------------------------------|-----------------------|--------------------------------------|
| <i>atp9F-atp9R</i>      | CCAAGTGAGATGTCCAAGAT<br>CTTCGGTTAGAGCAAAGCC     | 50                    | Duminil <i>et al.</i> , 2002         |
| <i>ccb203F-ccb203R</i>  | ASGTTCTACGGACCGATGCC<br>CACGGGGAGGGAGCRGGCGA    | 56                    | Duminil <i>et al.</i> , 2002         |
| <i>ccb206F-ccb206R</i>  | TCAATCTTGTRAACTAATCG<br>CYYCTCCACACCAATCACGA    | 62                    | Duminil <i>et al.</i> , 2002         |
| <i>ccb256F-ccb256R</i>  | GGAAGTTAGCAAAGTTAGAC<br>TTGTTCTTAACAGCGATGGC    | 56                    | Duminil <i>et al.</i> , 2002         |
| <i>cox2/1-cox2/2</i>    | TTTTCTTCCTCATTTCTKATTT<br>CCACTCTATTGTCCACTTCTA | 50                    | Dumolin-Lapegue <i>et al.</i> , 1997 |
| <i>cox3F-cox3R</i>      | CCGTAGGAGGTGTGATGT<br>CTCCCCACCAATAGATAGAG      | 58                    | Duminil <i>et al.</i> , 2002         |
| <i>orf25F-orf25R</i>    | AAGACCRCCAAGCYTCTCG<br>TTGCTGCTATTCTATCTATT     | 50                    | Duminil <i>et al.</i> , 2002         |
| <i>rpl5F-rpl5R</i>      | AGTGGTAAAGTCTCATCT<br>ATYGTGTGAAATAAGAGTAG      | 50                    | Duminil <i>et al.</i> , 2002         |
| <i>rps4F-rps4R</i>      | CSTTTCYGCTCCGAAGAG<br>TCTCCGAAGATTGAGG          | 58                    | Duminil <i>et al.</i> , 2002         |
| <i>rps12-1-nad3-2</i>   | TTTCTTCTCTACCATGACGA<br>TGATCCYACTCGGTSTTCCT    | 50                    | Duminil <i>et al.</i> , 2002         |
| <i>rrn5-rrn18-1</i>     | GAGGTCGGAATGGGATCGGG<br>GGGTGAAGTCGTAACAAGGT    | 58                    | Duminil <i>et al.</i> , 2002         |
| <i>mh44_F-mh44_R</i>    | ATGACTGGAAGAATTGCTCAC<br>TTCACCTGATACTCACCCCC   | 55                    | Duminil <i>et al.</i> , 2002         |
| <i>nad1/B-nad1/C</i>    | GCATTACGATCTGCAGCTCA<br>GGAGCTCGATTAGTTTCTGC    | 57.5                  | Demesure <i>et al.</i> , 1995        |
| <i>nad4/1-nad4/2</i>    | CAGTGGGTTGGTCTGGTATG<br>TCATATGGGCTACTGAGGAG    | 57.5                  | Demesure <i>et al.</i> , 1995        |
| <i>hc_mt1F-hc_mt1R</i>  | AGGGTGGCTATTTCTCGCTC<br>CGAGAAAGAATAGAATCAAGGG  | 52                    | This study                           |
| <i>hc_mt2F-hc_mt2R</i>  | TGCTACTGCTGCTACCATGA<br>GCACCAGCAAAGCAAAGCT     | 50                    | This study                           |
| <i>hc_F3-hc_R3</i>      | AACATAGAACTGAGGTAATG<br>ATTACGCCAAAAGTATGCT     | 50                    | This study                           |
| <i>26SrRNA-tRNA-Leu</i> | AACATAGAACTGAGGTAATG<br>ATTACGCCAAAAGTATGCT     | 50                    | This study                           |
| <i>26SrRNA-tRNA-Leu</i> | ACGGATACTTTGTCATTAGA<br>TTTATGTGGTTCCGACTGTA    | 50                    | This study                           |
| <i>cox1-nad1</i>        | ACAAACAGTTAGTAAGGTCA<br>TTTCCAGTCTTCAAATCGGT    | 50                    | This study                           |

**Table S4.** Estimates of parameters of mismatch distribution and statistical tests #

| Population | $\theta_0$ | $\theta_1$ | $\tau(t)$ | SSD (P-value) | Rag (P-value) |
|------------|------------|------------|-----------|---------------|---------------|
| JX         | 7.794      | 16.549     | 1.977     | 0.059 (0.20)  | 0.121 (0.11)  |
| YF         | 1.995      | 23.125     | 2.125     | 0.014 (0.44)  | 0.042 (0.48)  |
| XL         | 1.552      | 37.285     | 3.131     | 0.002 (0.84)  | 0.013 (0.86)  |
| LD         | 0.028      | 14.214     | 4.205     | 0.003 (0.94)  | 0.020 (0.92)  |
| CH         | 0.171      | 122.344    | 5.359     | 0.004 (0.51)  | 0.020 (0.51)  |
| WM         | 1.872      | 50.859     | 2.607     | 0.005 (0.53)  | 0.023 (0.55)  |
| XY         | -          | -          | -         | -             | -             |
| JL         | 0.021      | 12.109     | 3.418     | 0.043 (0.07)  | 0.136 (0.04)  |
| DC         | 2.164      | 41.680     | 3.867     | 0.003 (0.69)  | 0.010 (0.87)  |
| HD         | 0.002      | 15.073     | 4.576     | 0.007 (0.61)  | 0.023 (0.76)  |
| YR         | 0.011      | 15.264     | 4.773     | 0.001 (0.95)  | 0.010 (0.99)  |
| SM         | 0.068      | 42.802     | 3.582     | 0.002 (0.90)  | 0.022 (0.84)  |
| XJ         | -          | -          | -         | -             | -             |
| TL         | -          | -          | -         | -             | -             |

#: SSD: the sum of squared deviation (SSD); Rag: Harpending's raggedness index;  $\theta_0=2N_0\mu$ ,  $\theta_1=2N_1\mu$ , where  $N_0$  and  $N_1$  are the population sizes before and after population expansion;  $\tau(t)$ : the time elapsed since a sudden expansion. "-": appropriate estimates were not derived from sequence data. Populations XJ and TL: Estimates were not available.

**Table S2:** Five hundred samples of alignment sequences each of which was a concatenated sequence of *cox1-nad1* and *26S-rRNA-tRNA-Leu* segments

**Table S3:** Four hundred and sixty-seven samples of ITS alignment sequences
